# Supplementary material for: Effects of mandibular setback with or without maxillary advancement osteotomies on pharyngeal airways: An overview of systematic reviews
Source: PubMed Central journal article supplement (PMC5633244; doi:10.1371/journal.pone.0185951), 2017-10-09
Supplement: pone.0185951.s001.pdf [file pone.0185951.s001.pdf]

## S1 Text: Detailed search strategy

### PUBMED

1. Review [Publication Type]
2. Review Literature as Topic [Mesh]
3. Meta-Analysis [Publication Type]
4. Meta-Analysis as Topic [Mesh]
5. Evidence-Based Medicine [Mesh]
6. Evidence-Based Dentistry [Mesh]
7. systematic review [all field]
8. review [all field]
9. overview [all field]
10. meta-analysis [all field]
11. evidence based medicine [all field]
12. evidence based dentistry [all field]
13. review literature [all field]
14. literature review [all field]
15. 1 or 2 or 3 or 4 or 5 or 6 or 7 or 8 or 9 or 10 or 11 or 12 or 13 or 14
16. Orthognathic Surgery [Mesh]
17. Orthognathic Surgical Procedures [Mesh]
18. orthognathic surgery [all field]
19. orthognathic surgical procedure [all field]
20. orthodontics surgery [all field]
21. mandibular surgery [all field]
22. maxillary surgery [all field]
23. bimaxillary surgery [all field]
24. jaw surgery [all field]
25. surgical orthodontic treatment [all field]
26. jaw setback [all field]
27. jaw movement [all field]
28. mandibular setback [all field]
29. maxillary advancement [all field]
30. 16 or 17 or 18 or 19 or 20 or 21 or 22 or 23 or 24 or 25 or 26 or 27 or 28 or 29
31. Pharynx [Mesh]
32. upper airway [all field]
33. pharynx [all field]
34. pharyngeal [all field]
35. oropharynx [all field]
36. oropharyngeal [all field]
37. nasopharynx [all field]
38. nasopharyngeal [all field]
39. hypopharynx [all field]
40. hypopharyngeal [all field]
41. 31 or 32 or 33 or 34 or 35 or 36 or 37 or 38 or 39 or 40
42. 15 and 30 and 41

## EMBASE

1. exp "systematic review"/
2. meta analysis/
3. exp evidence based medicine/
4. exp evidence based dentistry/
5. systematic review.mp.
6. review.mp.
7. overview.mp.
8. meta-analysis.mp.
9. evidence based medicine.mp.
10. evidence based dentistry.mp.
11. review literature.mp.
12. literature review.mp.
13. 1 or 2 or 3 or 4 or 5 or 6 or 7 or 8 or 9 or 10 or 11 or 12
14. exp orthognathic surgery/
15. orthognathic surgery.mp.
16. orthognathic surgical procedure.mp.
17. orthodontics surgery.mp.
18. mandibular surgery.mp.
19. maxillary surgery.mp.
20. bimaxillary surgery.mp.
21. jaw surgery.mp.
22. surgical orthodontic treatment.mp.
23. jaw setback.mp.
24. jaw movement.mp.
25. mandibular setback.mp.
26. maxillary advancement.mp.
27. 14 or 15 or 16 or 17 or 18 or 19 or 20 or 21 or 22 or 23 or 24 or 25 or 26
28. exp pharynx/
29. upper airway.mp.
30. pharynx.mp.
31. pharyngeal.mp.
32. oropharynx.mp.
33. oropharyngeal.mp.
34. nasopharynx.mp.
35. nasopharyngeal.mp.
36. hypopharynx.mp.
37. hypopharyngeal.mp.
38. 28 or 29 or 30 or 31 or 32 or 33 or 34 or 35 or 36 or 37
39. 13 and 27 and 38

## COCHRANE LIBRARY

1. MeSH descriptor: [Meta-Analysis] explode all trees
2. MeSH descriptor: [Review] explode all trees
3. MeSH descriptor: [Evidence-Based Medicine] explode all trees
4. MeSH descriptor: [Evidence-Based Dentistry] explode all trees
5. systematic review
6. review

7. overview
8. meta-analysis
9. evidence based medicine
10. evidence based dentistry
11. review literature
12. literature review
13. #1 or #2 or #3 or #4 or #5 or #6 or #7 or #8 or #9 or #10 or #11 or #12
14. MeSH descriptor: [Orthognathic Surgery] explode all trees
15. orthognathic surgery
16. orthognathic surgical procedure
17. orthodontics surgery
18. mandibular surgery
19. maxillary surgery
20. bimaxillary surgery
21. jaw surgery
22. surgical orthodontic treatment
23. jaw setback
24. jaw movement
25. mandibular setback
26. maxillary advancement
27. #14 or #15 or #16 or #17 or #18 or #19 or #20 or #21 or #22 or #23 or #24 or #25 or #26
28. MeSH descriptor: [Pharynx] explode all trees
29. upper airway
30. pharynx
31. pharyngeal
32. oropharynx
33. oropharyngeal
34. hypopharynx
35. hypopharyngeal
36. #28 or #29 or #30 or #31 or #32 or #33 or #34 or #35
37. #13 and #27 and #36

## SCOPUS

1. TITLE-ABS-KEY ( systematic AND review )
2. TITLE-ABS-KEY ( review )
3. TITLE-ABS-KEY ( overview )
4. TITLE-ABS-KEY ( meta-analysis )
5. TITLE-ABS-KEY ( evidence AND based AND medicine )
6. TITLE-ABS-KEY ( evidence AND based AND dentistry )
7. TITLE-ABS-KEY ( review AND literature )
8. TITLE-ABS-KEY ( literature AND review )
9. #1 or #2 or #3 or #4 or #5 or #6 or #7 or #8
10. TITLE-ABS-KEY ( orthognathic AND surgery )
11. TITLE-ABS-KEY ( orthognathic AND surgical AND procedure )
12. TITLE-ABS-KEY ( orthodontics AND surgery )
13. TITLE-ABS-KEY ( mandibular AND surgery )
14. TITLE-ABS-KEY ( maxillary AND surgery )

15. TITLE-ABS-KEY ( bimaxillary AND surgery )
16. TITLE-ABS-KEY ( jaw AND surgery )
17. TITLE-ABS-KEY ( surgical AND orthodontic AND treatment )
18. TITLE-ABS-KEY ( jaw AND setback )
19. TITLE-ABS-KEY ( jaw AND movement )
20. TITLE-ABS-KEY ( mandibular AND setback )
21. TITLE-ABS-KEY ( maxillary AND advancement )
22. #10 or #11 or #12 or #13 or #14 or #15 or #16
23. #17 or #18 or #19 or #20 or #21 or #22
24. TITLE-ABS-KEY ( upper AND airway )
25. TITLE-ABS-KEY ( pharynx )
26. TITLE-ABS-KEY ( pharyngeal )
27. TITLE-ABS-KEY ( oropharyngeal )
28. TITLE-ABS-KEY ( nasopharyngeal )
29. TITLE-ABS-KEY ( hypopharyngeal )
30. TITLE-ABS-KEY ( hypopharynx )
31. TITLE-ABS-KEY ( nasopharynx )
32. TITLE-ABS-KEY ( oropharynx )
33. #24 or #25 or #26 or #27 or #28 or #29 or #30
34. #31 or #32 or #33
35. #9 and #23 and #34

Web of Science

*Search field: topic*

(Systematic review OR review OR overview OR meta-analysis OR evidence based medicine OR evidence based dentistry OR review literature OR literature review) AND (orthognathic surgery OR orthognathic surgical procedure OR orthodontics surgery OR mandibular surgery OR maxillary surgery OR bimaxillary surgery OR jaw surgery OR surgical orthodontic treatment OR jaw setback OR jaw movement OR mandibular setback OR maxillary advancement) AND (upper airway OR pharynx OR pharyngeal OR oropharynx OR oropharyngeal OR nasopharynx OR nasopharyngeal OR hypopharynx OR hypopharyngeal)
